# Supplementary material for: Nanostructured Semiconducting Metal Oxide Gas Sensors for Acetaldehyde Detection
Source: Preprints.org preprint supplement (doi:10.20944/preprints201908.0279.v1), 2019-08-27
Supplement: Supplementary file 2 [file supplementary]

## ELSEVIER LICENSE TERMS AND CONDITIONS

Aug 23, 2019

This Agreement between Ali Mirzaei ("You") and Elsevier ("Elsevier") consists of your license details and the terms and conditions provided by Elsevier and Copyright Clearance Center.

|                                                 |                                                                                                                      |
|-------------------------------------------------|----------------------------------------------------------------------------------------------------------------------|
| License Number                                  | 4654860054479                                                                                                        |
| License date                                    | Aug 23, 2019                                                                                                         |
| Licensed Content Publisher                      | Elsevier                                                                                                             |
| Licensed Content Publication                    | Sensors and Actuators B: Chemical                                                                                    |
| Licensed Content Title                          | High sensitivity in Al-doped ZnO nanoparticles for detection of acetaldehyde                                         |
| Licensed Content Author                         | Ran Yoo,Dongmei Li,Hyun Jun Rim,Sungmee Cho,Hyun-Sook Lee,Wooyoung Lee                                               |
| Licensed Content Date                           | Aug 1, 2018                                                                                                          |
| Licensed Content Volume                         | 266                                                                                                                  |
| Licensed Content Issue                          | n/a                                                                                                                  |
| Licensed Content Pages                          | 6                                                                                                                    |
| Start Page                                      | 883                                                                                                                  |
| End Page                                        | 888                                                                                                                  |
| Type of Use                                     | reuse in a journal/magazine                                                                                          |
| Requestor type                                  | publisher                                                                                                            |
| Intended publisher of new work                  | MDPI AG                                                                                                              |
| Portion                                         | figures/tables/illustrations                                                                                         |
| Number of figures/tables/illustrations          | 1                                                                                                                    |
| Format                                          | both print and electronic                                                                                            |
| Are you the author of this Elsevier article?    | No                                                                                                                   |
| Will you be translating?                        | No                                                                                                                   |
| Original figure numbers                         | Figure 5                                                                                                             |
| Title of the article                            | Nanostructured semiconducting metal oxide gas sensors for acetaldehyde detection                                     |
| Publication new article is in                   | Chemosensors                                                                                                         |
| Publisher of the new article                    | MDPI AG                                                                                                              |
| Author of new article                           | Ali Mirzaeia, Hyoun Woo Kim,Sang Sub Kim, Giovanni Neri                                                              |
| Expected publication date                       | Dec 2019                                                                                                             |
| Estimated size of new article (number of pages) | 15                                                                                                                   |
| Requestor Location                              | Ali Mirzaei<br>The Research Institute of Industrial Science, Hanyang University,<br>Seoul 133-791, Republic of Korea |

Seoul, I402-751  
Korea, Republic Of  
Attn: Ali Mirzaei

Publisher Tax ID

GB 494 6272 12

Total

0.00 USD

[Terms and Conditions](#)

## INTRODUCTION

1. The publisher for this copyrighted material is Elsevier. By clicking "accept" in connection with completing this licensing transaction, you agree that the following terms and conditions apply to this transaction (along with the Billing and Payment terms and conditions established by Copyright Clearance Center, Inc. ("CCC"), at the time that you opened your Rightslink account and that are available at any time at <http://myaccount.copyright.com>).

## GENERAL TERMS

2. Elsevier hereby grants you permission to reproduce the aforementioned material subject to the terms and conditions indicated.

3. Acknowledgement: If any part of the material to be used (for example, figures) has appeared in our publication with credit or acknowledgement to another source, permission must also be sought from that source. If such permission is not obtained then that material may not be included in your publication/copies. Suitable acknowledgement to the source must be made, either as a footnote or in a reference list at the end of your publication, as follows:

"Reprinted from Publication title, Vol /edition number, Author(s), Title of article / title of chapter, Pages No., Copyright (Year), with permission from Elsevier [OR APPLICABLE SOCIETY COPYRIGHT OWNER]." Also Lancet special credit - "Reprinted from The Lancet, Vol. number, Author(s), Title of article, Pages No., Copyright (Year), with permission from Elsevier."

4. Reproduction of this material is confined to the purpose and/or media for which permission is hereby given.

5. Altering/Modifying Material: Not Permitted. However figures and illustrations may be altered/adapted minimally to serve your work. Any other abbreviations, additions, deletions and/or any other alterations shall be made only with prior written authorization of Elsevier Ltd. (Please contact Elsevier at [permissions@elsevier.com](mailto:permissions@elsevier.com)). No modifications can be made to any Lancet figures/tables and they must be reproduced in full.

6. If the permission fee for the requested use of our material is waived in this instance, please be advised that your future requests for Elsevier materials may attract a fee.

7. Reservation of Rights: Publisher reserves all rights not specifically granted in the combination of (i) the license details provided by you and accepted in the course of this licensing transaction, (ii) these terms and conditions and (iii) CCC's Billing and Payment terms and conditions.

8. License Contingent Upon Payment: While you may exercise the rights licensed immediately upon issuance of the license at the end of the licensing process for the transaction, provided that you have disclosed complete and accurate details of your proposed use, no license is finally effective unless and until full payment is received from you (either by publisher or by CCC) as provided in CCC's Billing and Payment terms and conditions. If full payment is not received on a timely basis, then any license preliminarily granted shall be deemed automatically revoked and shall be void as if never granted. Further, in the event that you breach any of these terms and conditions or any of CCC's Billing and Payment terms and conditions, the license is automatically revoked and shall be void as if never granted. Use of materials as described in a revoked license, as well as any use of the materials beyond the scope of an unrevoked license, may constitute copyright infringement
