# Supplementary material for: Nanostructured Semiconducting Metal Oxide Gas Sensors for Acetaldehyde Detection
Source: Preprints.org preprint supplement (doi:10.20944/preprints201908.0279.v1), 2019-08-27
Supplement: Supplementary file 3 [file supplementary]

**ELSEVIER LICENSE  
TERMS AND CONDITIONS**

Aug 25, 2019

---

This Agreement between Ali Mirzaei ("You") and Elsevier ("Elsevier") consists of your license details and the terms and conditions provided by Elsevier and Copyright Clearance Center.

|                                              |                              |
|----------------------------------------------|------------------------------|
| License Number                               | 4655800279881                |
| License date                                 | Aug 25, 2019                 |
| Licensed Content Publisher                   | Elsevier                     |
| Licensed Content Publication                 | Materials Today              |
| Licensed Content Title                       | Nanostructures of zinc oxide |
| Licensed Content Author                      | Zhong Lin Wang               |
| Licensed Content Date                        | Jun 1, 2004                  |
| Licensed Content Volume                      | 7                            |
| Licensed Content Issue                       | 6                            |
| Licensed Content Pages                       | 8                            |
| Start Page                                   | 26                           |
| End Page                                     | 33                           |
| Type of Use                                  | reuse in a journal/magazine  |
| Requestor type                               | publisher                    |
| Intended publisher of new work               | MDPI AG                      |
| Portion                                      | figures/tables/illustrations |
| Number of figures/tables/illustrations       | 1                            |
| Format                                       | both print and electronic    |
| Are you the author of this Elsevier article? | No                           |
| Will you be translating?                     | No                           |
| Original figure numbers                      | Figure 1                     |

|                                                 |                                                                                                                                                                                        |
|-------------------------------------------------|----------------------------------------------------------------------------------------------------------------------------------------------------------------------------------------|
| Title of the article                            | Nanostructured semiconducting metal oxide gas sensors for acetaldehyde detection                                                                                                       |
| Publication new article is in                   | Chemosensors                                                                                                                                                                           |
| Publisher of the new article                    | MDPI AG                                                                                                                                                                                |
| Author of new article                           | Ali Mirzaei, Hyoun Woo Kim, Sang Sub Kim, Giovanni Neri                                                                                                                                |
| Expected publication date                       | Dec 2019                                                                                                                                                                               |
| Estimated size of new article (number of pages) | 15                                                                                                                                                                                     |
| Requestor Location                              | Ali Mirzaei<br>The Research Institute of Industrial Science, Hanyang University,<br>Seoul 133-791, Republic of Korea<br><br>Seoul, 1402-751<br>Korea, Republic Of<br>Attn: Ali Mirzaei |
| Publisher Tax ID                                | GB 494 6272 12                                                                                                                                                                         |
| Total                                           | 0.00 USD                                                                                                                                                                               |
| Terms and Conditions                            |                                                                                                                                                                                        |

### INTRODUCTION

1. The publisher for this copyrighted material is Elsevier. By clicking "accept" in connection with completing this licensing transaction, you agree that the following terms and conditions apply to this transaction (along with the Billing and Payment terms and conditions established by Copyright Clearance Center, Inc. ("CCC"), at the time that you opened your Rightslink account and that are available at any time at <http://myaccount.copyright.com>).

### GENERAL TERMS

2. Elsevier hereby grants you permission to reproduce the aforementioned material subject to the terms and conditions indicated.

3. Acknowledgement: If any part of the material to be used (for example, figures) has appeared in our publication with credit or acknowledgement to another source, permission must also be sought from that source. If such permission is not obtained then that material may not be included in your publication/copies. Suitable acknowledgement to the source must be made, either as a footnote or in a reference list at the end of your publication, as follows:

"Reprinted from Publication title, Vol /edition number, Author(s), Title of article / title of chapter, Pages No., Copyright (Year), with permission from Elsevier [OR APPLICABLE SOCIETY COPYRIGHT OWNER]." Also Lancet special credit - "Reprinted from The Lancet, Vol. number, Author(s), Title of article, Pages No., Copyright (Year), with permission from Elsevier."
